# Supplementary material for: A novel bifunctional acetyl xylan esterase/arabinofuranosidase from Penicillium chrysogenum P33 enhances enzymatic hydrolysis of lignocellulose
Source: PubMed Central journal article supplement (PMC5615437; doi:10.1186/s12934-017-0777-7), 2017-09-26

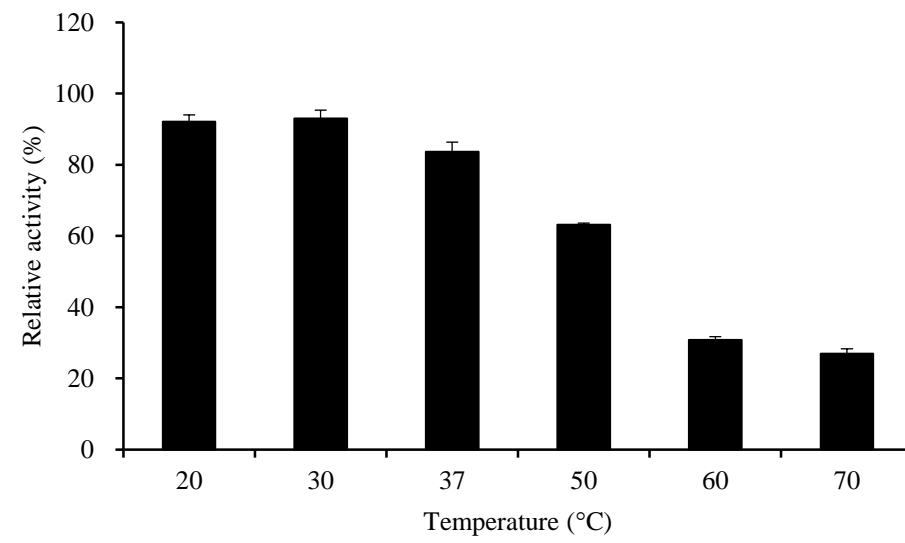

Supplement: 12934_2017_777_MOESM4_ESM.pdf [file 12934_2017_777_MOESM4_ESM.pdf]
