# Supplementary material for: A novel bifunctional acetyl xylan esterase/arabinofuranosidase from Penicillium chrysogenum P33 enhances enzymatic hydrolysis of lignocellulose
Source: PubMed Central journal article supplement (PMC5615437; doi:10.1186/s12934-017-0777-7), 2017-09-26
Supplement: 12934_2017_777_MOESM5_ESM.pdf [file 12934_2017_777_MOESM5_ESM.pdf]

Table S1 Hydrolysis of water-soluble wheat arabinoxylan by recombinant xylanase, rPcAxe and the enzymatic mix

| Enzyme          | Reducing sugar<br>(mg/mL) | Xylose<br>(mg/mL) | Arabinose<br>(mg/mL) | Acetic acid<br>(mg/mL) |
|-----------------|---------------------------|-------------------|----------------------|------------------------|
| X <sup>a</sup>  | 0.423 ± 0.007             | 0.295 ± 0.003     | ND <sup>d</sup>      | ND                     |
| A <sup>b</sup>  | 0.034 ± 0.009             | 0.029 ± 0.001     | 0.003 ± 0.001        | 0.057 ± 0.004          |
| XA <sup>c</sup> | 0.665 ± 0.017             | 0.507 ± 0.012     | 0.009 ± 0.001        | 0.071 ± 0.002          |

Values are the means and standard deviations of triplicate experiments.

<sup>a</sup> Recombinant xylanase from *S. commune*;

<sup>b</sup> rPcAxe;

<sup>c</sup> Mixtures of recombinant xylanase from *S. commune* and rPcAxe;

<sup>d</sup> Not detected.
